# Supplementary material for: Extracellular Expression of Feruloyl Esterase and Xylanase in Escherichia coli for Ferulic Acid Production from Agricultural Residues
Source: MDPI journal article supplement (doi:10.3390/microorganisms11081869), 2023-07-25
Supplement: s1 [file s1]

**Table S1 Primers used in this study**

| Primers                        | Sequence (5'-3')                       |
|--------------------------------|----------------------------------------|
| F- <i>EcoR</i> I- <i>fae</i>   | CATGAATTCGGCTCGTCTGCAG                 |
| R- <i>Hind</i> III- <i>fae</i> | GCTAAGCTTTTAACCGAACATCC                |
| F- <i>EcoR</i> I- <i>xyn</i>   | CACGAATTCGGCTACCACCATCACCGAAAAC        |
| R- <i>Hind</i> III- <i>xyn</i> | GCTAAGCTTACCAGAGTTAGAACCAGCACCAG       |
| F1- <i>Bgl</i> II- <i>fae</i>  | GGTAACGACAACGTTAAAAGATCTGCTCGTCTGCAG   |
| F1-2                           | GAAGACAACCTCAAACACCTGCTGGGTAACGACAAC   |
| F1- <i>Nde</i> I               | GCTCATATGGAAGGTAACACCCGTGAAGACAACCTTC  |
| F2- <i>Bgl</i> II- <i>fae</i>  | GGTGACCGTGAAGAACCGAGATCTGCTCGTCTGCAG   |
| F2-2                           | GAACGTGACGGTCTGACCCTGGTTGGTGACCGTGAAG  |
| F2- <i>Nde</i> I               | GCTCATATGCTCTCGTATCACCATCGAACGTGACGGTC |
| F3- <i>Nde</i> I               | GCTCATATGCTCTCGTGTACCATCGAACGTGACGGTC  |
| F4-2                           | GAACGTGACTCTCTGACCCTGGTTGGTGACCGTGAAG  |
| F4- <i>Nde</i> I               | GCTCATATGCTCTCGTATCACCATCGAACGTGACTCTC |
| F5- <i>Bgl</i> II- <i>fae</i>  | GTCTGCTGGAAGGTACCAGATCTGCTCGTCTGCAG    |
| F5-2                           | ACGTGACGGTCTGAAACTGTACGGTCTGCTGGAAGG   |
| F5- <i>Nde</i> I               | GCTCATATGGAAATCACCATCAAACGTGACGGTCTG   |
| R- <i>Xho</i> I- <i>fae</i>    | CATCTCGAGACCGAACATCCATTCAACAACCTTAGC   |
| F- <i>Bgl</i> II- <i>xyn</i>   | CACAGATCTGCTACCACCATCACCGAAAAC         |
| R- <i>Xho</i> I- <i>xyn</i>    | CATCTCGAGACCAGAGTTAGAACCAGCACCAG       |
| F- <i>Nde</i> I- <i>osmY</i>   | GCTCATATGACTATGACAAGACTGAAGATTTTCG     |
| R- <i>osmY</i> -3GS            | AGAACCAGAACCAGAACCCTTAGTTTTTCAGATCA    |
| F-3GS- <i>fae</i>              | GGTTCTGGTTCTGGTTCTGCTCGTCTGCAGATC      |
| F-3GS- <i>xyn</i>              | GGTTCTGGTTCTGGTTCTGCTACCACCATCACCG     |
| F1- <i>Nco</i> I               | CATCCATGGAAGGTAACACCCG                 |
| R- <i>EcoR</i> I- <i>fae</i>   | GCTGAATTCCTTAACCGAACATCC               |
